# Supplementary material for: Genome Update of the Dimorphic Human Pathogenic Fungi Causing Paracoccidioidomycosis
Source: PLoS Negl Trop Dis. 2014 Dec 4;8(12):e3348. doi: 10.1371/journal.pntd.0003348 (PMC4256289; doi:10.1371/journal.pntd.0003348)
Supplement: Table S1 — Summary of assembly and gene statistics of v1 and the updated v2 of the three reference genomes of Paracoccidioides spp. (XLSX) [file pntd.0003348.s005.xlsx]

## Sheet: TableS1
Table S1. Summary of assembly and gene statistics of v1 and the updated v2 of the three reference genomes of Paracoccidioides spp.
	P. brasiliensis				P. lutzii
Metric	Pb18 v1	Pb18 v2	Pb03 v1	Pb03 v2	Pb01 v1	Pb01 v2
Assembly Size	29.95	29.95	29.06	29.06	32.94	32.93
Total contig length (Mb)	29.4	29.47	28.79	28.84	32.55	32.63
Scaffolds	57	57	65	65	111	110
Scaffold N50 (Mb)	2.15	2.15	1.88	1.88	1.03	1.03
Contigs	669	556	552	496	885	672
Contig N50 (kb)	109.68	123.84	114.92	119.9	84.28	113.45
Genes	8741	8390	7875	8427	9132	8826
Exons	33239	25785	27450	25457	37311	26877
Mean Intergenic Distance	1628.43	1932.12	1849.21	1830.53	1799.26	2123.85
% Genome Coding	39.28	38.97	38.84	39.94	36.86	36.12
GC Scaffolds (%)	44.36	44.35	44.5	44.49	42.82	42.82
GC Genes (%)	48.48	49.28	48.86	49.28	48.05	48.93
GC Intergenic (%)	39.63	40.11	40.12	40.28	37.44	38.27
GC Exons (%)	50.07	50.6	50.35	50.63	49.77	50.36
GC Intron (%)	42.27	41.34	42.44	41.02	41.71	40.59
